# Supplementary material for: Synergistic photocatalysis–Fenton reaction for selective conversion of methane to methanol at room temperature
Source: Royal Society of Chemistry journal article supplement (doi:10.1039/d0cy00028k), 2020-01-01
Supplement: d0cy00028k1.pdf [file d0cy00028k1.pdf]

## Supplementary Information

### **Synergistic photocatalysis-Fenton reactions for selective conversion of methane to methanol at room temperature**

Yi Zeng,<sup>a,#</sup> Hang Chen Liu,<sup>a,#</sup> Jing Sheng Wang,<sup>a</sup> Xing Yang Wu<sup>a,b</sup> and Song Ling Wang,<sup>a,b,\*</sup>

#### **Experimental procedures**

##### **Materials**

The commercial TiO<sub>2</sub> (P25), Fe<sub>2</sub>O<sub>3</sub>, NiO, CuO, ZnO and WO<sub>3</sub> catalysts are supplied by Macklin. FeCl<sub>2</sub>·4H<sub>2</sub>O was purchased from Macklin. H<sub>2</sub>O<sub>2</sub> (30%) was supplied from Shanghai Lingfeng Chemical Reagent Co., Ltd. CH<sub>4</sub> (>99.99%) was supplied by Air Liquide. All of the chemicals above were used as received without further purification.

##### **Characterizations**

The crystal structure of the samples were measured by X-ray diffraction (XRD, SHIMADZU XRD-6100) with Cu K $\alpha$  radiation ( $\lambda=1.54 \text{ \AA}$ ) in the  $2\theta$  range from 10° to 80°. The data was recorded at a scan rate of 5° / min. The morphology of TiO<sub>2</sub> was observed by transmission electron microscopy (TEM, FEI Tecnai G2 F20). Electron spin resonance (ESR) spectra of radical spin-trapped by 5,5-dimethyl-1-pyrroline N-

---

oxide (DMPO) were measured by a spectrometer (Bruker A300). In a typical measurement, 20 mg catalyst was dispersed in 20 ml deionized water. Then 2 ml 0.01M FeCl<sub>2</sub> solution was added in the above suspension, followed by stirring for 5 min. After that, 200 μl H<sub>2</sub>O<sub>2</sub> was added in the suspension. 5,5-dimethyl-1-pyrroline N-oxide (DMPO) was used as the trapping reagent for both hydroxyl radicals (•OH) and superoxide radicals (•O<sub>2</sub><sup>-</sup>) detection. The ESR signals were collected after irradiation for 5 min (a xenon lamp with AM 1.5G filter was used as solar light source).

### **Conversion of methane**

The Photocatalysis-Fenton reaction for conversion of methane was carried out in an autoclave of 130 ml volume equipped with a quartz window. A 300 W Xenon lamp (PLS-SXE 300, Perfect light) with AM 1.5G filter was used to provide solar light source. In a typical experiment, 20 mg catalyst were dispersed in 20 ml deionized water to form a suspension. Then, 2 ml FeCl<sub>2</sub> (0.01 M) solution was added into the above suspension, followed by stirring for 5 min. Subsequently, 200 μl H<sub>2</sub>O<sub>2</sub> (30%) was added to the suspension ( In these experiments of controlling H<sub>2</sub>O<sub>2</sub> / Fe<sup>2+</sup> ratios, the H<sub>2</sub>O<sub>2</sub> dosages varied according to Fe<sup>2+</sup> concentration). Thereafter, the above suspension was placed into the reactor (see Figure S1). Then, the reactor was purged with methane for several times to replace initial air. After that, 3 MPa methane was injected into the reactor. The Photocatalysis-Fenton reaction was then carried out under solar light irradiation and the temperature of the suspension was maintained at 30 °C.

---

After reaction for 1 h, the reactor was cooled in an ice bath for 1h. Subsequently, the gas in the reactor was injected into a gas chromatography to detect CO<sub>2</sub> and CO. Nevertheless, no CO<sub>2</sub> or CO were detected by the gas chromatography (KE CHUANG, GC 2002) equipped with two flame ionization detectors (FID1 and FID2) and one thermal conductivity detector (TCD). FID1 and TCD were connected to a TDX-01 column (2m × 3mm). The FID2 was connected to a GDX-502 column (4m × 3mm). The suspension in the reactor was then filtered and collected. The products (CH<sub>3</sub>OH, CH<sub>3</sub>CHO) in the solution collected from the suspension were analyzed with the gas chromatography mentioned above. Formic acid (HCOOH) in the solution was analyzed with a high performance liquid chromatography (SHIMADZU, Essentia CTO-16) equipped with a RSpak KC-811 6E column (Shodex) using 0.1% H<sub>3</sub>PO<sub>4</sub> solution as mobile phase.

### Selectivity and conversion rate calculation

The selectivity of methanol is calculated by the following equation:

The selectivity of methanol is calculated by the following equation:

$$\text{Selectivity (\%)} = \frac{N(\text{CH}_3\text{OH})}{N(\text{HCOOH}) + N(\text{CH}_3\text{OH}) + N(\text{CH}_3\text{CHO})} \times 100\%$$

$$\text{Conversion rate (\%)} \text{ of methane} = \frac{\text{moles of CH}_4 \text{ consumed}}{\text{moles of initial CH}_4} \times 100\%$$

Here, mole of CH<sub>4</sub> consumed = N (HCOOH) + N (CH<sub>3</sub>OH) + 2N (CH<sub>3</sub>CHO)”

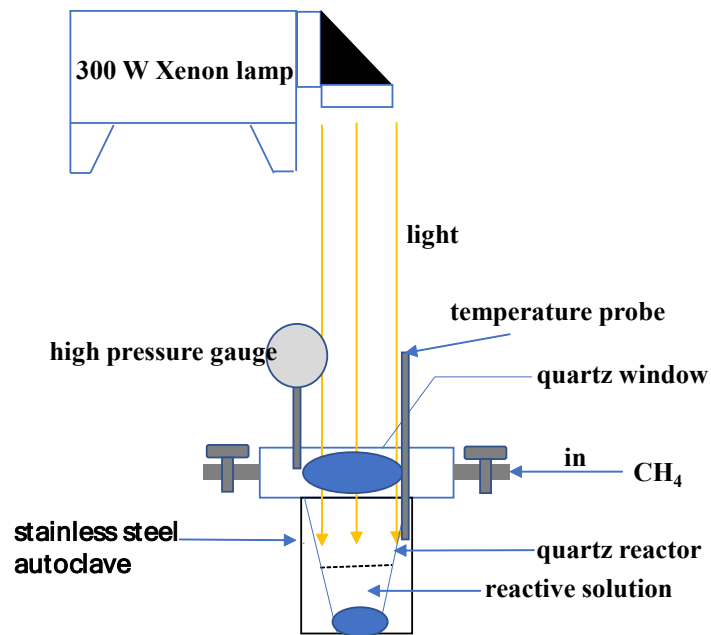

Fig. S1. Schematic reactor of conversion of methane.

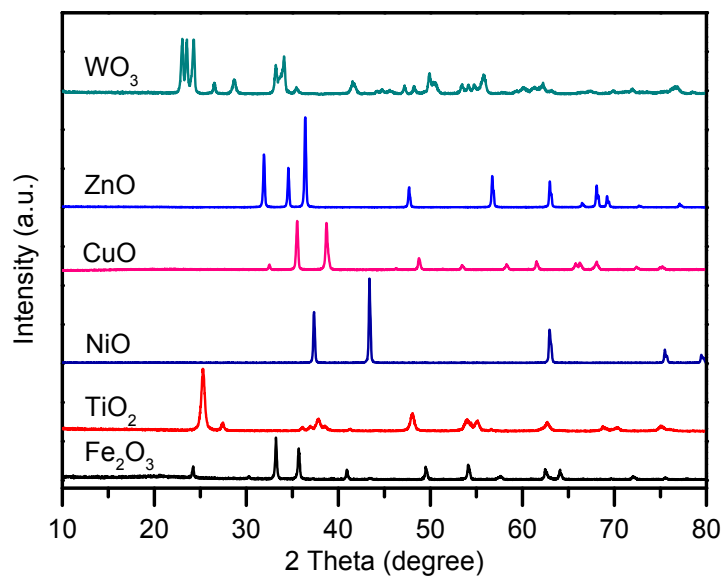

Fig. S2. XRD patterns of different catalysts.

**Table S1.** Conversion rates of methane in different PCFR, PCR, PFR, and FR processes.

| Reactions | Products<br>( $\mu\text{mol g}^{-1} \text{h}^{-1}$ ) |                    |                     | Selectivity (%)    | Conversion rates (%) |
|-----------|------------------------------------------------------|--------------------|---------------------|--------------------|----------------------|
|           | HCOOH                                                | CH <sub>3</sub> OH | CH <sub>3</sub> CHO | CH <sub>3</sub> OH | CH <sub>4</sub>      |
| PCFR      | 34                                                   | 471                | 53                  | 84                 | 0.39                 |
| PCR       | 64                                                   | 64                 | 0                   | 50                 | 0.08                 |
| PFR       | 0                                                    | 165                | 59                  | 74                 | 0.15                 |
| FR        | 0                                                    | 39                 | 26                  | 60                 | 0.06                 |

**Table S2.** Conversion rates of methane with different metal oxide semiconductor catalysts.

| Catalysts                      | Products<br>( $\mu\text{mol g}^{-1} \text{h}^{-1}$ ) |                    |                     | Selectivity (%)    | Conversion rates (%) |
|--------------------------------|------------------------------------------------------|--------------------|---------------------|--------------------|----------------------|
|                                | HCOOH                                                | CH <sub>3</sub> OH | CH <sub>3</sub> CHO | CH <sub>3</sub> OH | CH <sub>4</sub>      |
| Fe <sub>2</sub> O <sub>3</sub> | 101                                                  | 71                 | 30                  | 35                 | 0.15                 |
| TiO <sub>2</sub>               | 34                                                   | 471                | 53                  | 84                 | 0.39                 |
| NiO                            | 300                                                  | 52                 | 32                  | 14                 | 0.27                 |
| CuO                            | 454                                                  | 151                | 38                  | 23                 | 0.43                 |
| ZnO                            | 0                                                    | 0                  | 38                  | 0                  | 0.05                 |
| WO <sub>3</sub>                | 871                                                  | 350                | 92                  | 27                 | 0.89                 |

**Table S3.** Comparison of conversion of methane to methanol in different reactive processes over various catalyst reported.

| Catalysts                                                           | Methods                                             | Temperature and pressure | Generation rates of CH <sub>3</sub> OH ( $\mu\text{mol g}^{-1} \text{h}^{-1}$ ) | Selectivity of CH <sub>3</sub> OH (%) | Ref.      |
|---------------------------------------------------------------------|-----------------------------------------------------|--------------------------|---------------------------------------------------------------------------------|---------------------------------------|-----------|
| La/WO <sub>3</sub>                                                  | <sup>[a]</sup> PCR: mercury lamp, UVC-visible light | 55 °C, 0.1MPa            | 32                                                                              | 47                                    | 1         |
| WO <sub>3</sub>                                                     | PCR: mercury lamp, UVC-visible light                | 55 °C, 0.1MPa            | 55.5                                                                            | 38                                    | 2         |
| BiVO <sub>4</sub> /V <sub>2</sub> O <sub>5</sub>                    | PCR: 450 W Hg lamp, UVC-visible light               | 70 °C, 0.1MPa            | 10.7                                                                            | 29.5                                  | 3         |
| g-C <sub>3</sub> N <sub>4</sub> @Cs <sub>0.33</sub> WO <sub>3</sub> | PCR: 300 W Xe lamp,                                 | 25 °C, 0.1MPa            | 4.38                                                                            | 51.5                                  | 4         |
| BiVO <sub>4</sub>                                                   | PCR: 450 W mercury lamp,UVC-visible ligh            | 25 °C, 0.1MPa            | 21                                                                              | 50                                    | 5         |
| BiVO <sub>4</sub>                                                   | PCR: 350 W Xe arc lamp, AM 1.5                      | 65 °C, 0.1MPa            | 134                                                                             | 85                                    | 6         |
| FeOOH/WO <sub>3</sub>                                               | PCR: 300 W Xe lamp, visible light                   | 25 °C, 0.1MPa            | 211                                                                             | 91                                    | 7         |
| Cu/MOR                                                              | <sup>[b]</sup> TDR: high temperature                | 200 °C, 0.7MPa           | 0.204mol/ Cu (mol)                                                              | 97                                    | 8         |
| Cu-ZSM-5                                                            | TDR: high temperature                               | 200 °C, 0.1MPa           | 13                                                                              | /                                     | 9, 10     |
| TiO <sub>2</sub>                                                    | <sup>[c]</sup> PCFR: 300 W Xe lamp, AM 1.5          | 30 °C, 3 MPa             | 471                                                                             | 83                                    | this work |

Abbreviations: <sup>[a]</sup>PCR, photocatalytic reaction; <sup>[b]</sup>TDR, thermodynamic reaction; <sup>[c]</sup>PCFR: photocatalysis-Fenton reaction

**Table S4.** Conversion rates of methane with different H<sub>2</sub>O<sub>2</sub>/Fe<sup>2+</sup> ratios.

| Ratios of H <sub>2</sub> O <sub>2</sub> /Fe <sup>2+</sup> | Products ( $\mu\text{mol g}^{-1} \text{h}^{-1}$ ) |                    |                     | Selectivity (%)    | Conversion rates (%) |
|-----------------------------------------------------------|---------------------------------------------------|--------------------|---------------------|--------------------|----------------------|
|                                                           | HCOOH                                             | CH <sub>3</sub> OH | CH <sub>3</sub> CHO | CH <sub>3</sub> OH | CH <sub>4</sub>      |
| 0                                                         | 0                                                 | 0                  | 0                   | 0                  | 0                    |
| 10                                                        | 0                                                 | 162                | 0                   | 100                | 0.10                 |
| 20                                                        | 34                                                | 471                | 53                  | 84                 | 0.39                 |
| 50                                                        | 53                                                | 325                | 180                 | 58                 | 0.47                 |
| 120                                                       | 179                                               | 294                | 189                 | 44                 | 0.48                 |

---

## References:

1. K. Villa, S. Murcia-López, J. R. Morante and T. Andreu, *Appl Catal B*, 2016, **187**, 30-36.
2. K. Villa, S. Murcia-López, T. Andreu and J. R. Morante, *Appl Catal B*, 2015, **163**, 150-155.
3. S. Murcia-López, M. C. Bacariza, K. Villa, J. M. Lopes, C. Henriques, J. R. Morante and T. Andreu, *ACS Catal*, 2017, **7**, 2878-2885.
4. Y. Li, J. Li, G. Zhang, K. Wang and X. Wu, *ACS Sustainable Chem. Eng*, 2019, **7**, 4382-4389.
5. S. Murcia-López, K. Villa, T. Andreu and J. R. Morante, *ACS Catal*, 2014, **4**, 3013-3019
6. Zhu W, Shen M, Fan G, *ACS Appl. Nano Mater.* 2018, 1, 6683–6691
7. J. Yang, J. Hao, J. Wei, J. Dai and Y. Li, *Fuel*, 2020, **266**.
8. V. L. Sushkevich, D. Palagin, M. Ranocchiari and J. A. van Bokhoven, *Science*, 2017, **356**, 523-527.
9. P. J. Smeets, M. H. Groothaert and R. A. Schoonheydt, *Catal Today*, 2005, **110**, 303-309.
10. A. A. Latimer, A. Kakekhani, A. R. Kulkarni and J. K. Nørskov, *ACS Catal.*, 2018, **8**, 6894-6907.
